1 **Extended-spectrum beta-lactamase (ESBL)-producing and non-ESBL-**  
2 **producing *Escherichia coli* isolates causing bacteremia in the**  
3 **Netherlands (2014 – 2016) differ in ST distribution, antimicrobial**  
4 **resistance gene and virulence gene content**

5 Denise van Hout\*<sup>1</sup>, Tess D. Verschuuren<sup>1</sup>, Patricia C.J. Bruijning-Verhagen<sup>1,2</sup>, Thijs Bosch<sup>2</sup>,  
6 Anita C. Schürch<sup>3</sup>, Rob J.L. Willems<sup>3</sup>, Marc J.M. Bonten<sup>1-3</sup>, Jan A.J.W. Kluytmans<sup>1,4</sup>

7

8 **Author affiliations:**

9 <sup>1</sup> Julius Center for Health Sciences and Primary Care, University Medical Center Utrecht,  
10 University Utrecht, Utrecht, The Netherlands

11 <sup>2</sup> Center for Infectious Disease Control, National Institute for Public Health and the Environment,  
12 Bilthoven, The Netherlands

13 <sup>3</sup> Department of Medical Microbiology, University Medical Center Utrecht, Utrecht, University  
14 Utrecht, The Netherlands

15 <sup>4</sup> Microvida Laboratory for Medical Microbiology and Department of Infection Control, Amphia  
16 Hospital, Breda, The Netherlands

17

18 **\* Corresponding author:**

19 Denise van Hout

20 UMC Utrecht; Julius Center

21 [D.vanHout-3@umcutrecht.nl](mailto:D.vanHout-3@umcutrecht.nl)

22

23

24

25

26 **ABSTRACT**

27 **Background:** Knowledge on the molecular epidemiology of *Escherichia coli* causing *E. coli*  
28 bacteremia (ECB) in the Netherlands is almost exclusively based on extended-spectrum beta-  
29 lactamase producing *E. coli* isolates (ESBL-PEc) that are responsible for about 10% of all ECB  
30 episodes. We determined clonal differences and differences in resistance and virulence gene  
31 content between non-ESBL-producing *E. coli* (non-ESBL-PEc) and ESBL-PEc isolates with  
32 different epidemiological characteristics.

33 **Materials/methods:** A random selection of non-ESBL-PEc isolates as well as all available  
34 ESBL-PEc blood isolates were obtained from two Dutch hospitals between January 2014 and  
35 December 2016. For comparative analysis, whole genome sequencing was performed of all  
36 isolates to infer the sequence types (STs), serotypes, antibiotic resistance by either acquired  
37 genes or chromosomal mutations and virulence gene (VG) scores, based on presence of 49  
38 predefined putative pathogenic VG.

39 **Results:** ST73 was most prevalent among the 212 non-ESBL-PEc (N = 26, 12.3%) and ST131  
40 among the 69 ESBL-PEc (N = 30, 43.5%). Prevalence of ST131 among non-ESBL-PEc was  
41 10.4% (N = 22, *P* value < 0.001 compared to ESBL-PEc). O25:H4 was the most common  
42 serotype in non-ESBL-PEc and ESBL-PEc. Median total resistance gene counts were 42 (IQR  
43 39 – 45) and 46 (IQR 43 – 50) for non-ESBL-PEc and ESBL-PEc, respectively (*P* value <  
44 0.001). Median acquired resistance gene counts were 1 (IQR 1 – 6) and 7 (IQR 4 – 9) for non-  
45 ESBL-PEc and ESBL-PEc, respectively (*P* value < 0.001). Median VG scores were 13 (IQR 9 –  
46 20) and 12 (IQR 8 – 14) for non-ESBL-PEc and ESBL-PEc isolates, respectively (*P* value =  
47 0.002). Resistance gene and VG content varied between different *E. coli* STs.

48 **Conclusions:** We observed differences between non-ESBL-PEc and ESBL-PEc blood isolates  
49 in ST distribution, resistance gene and virulence gene content.

## 50 INTRODUCTION

51 Despite advances in medical healthcare and in contrast to the decline in other infectious  
52 diseases, the annual incidence of Gram-negative bacteremia in Europe is increasing [1–4].  
53 *Escherichia coli* is the leading causative pathogen in Gram-negative bacteremia and is  
54 associated with 30-day mortality up to 18% [1,4–6]. Antibiotic treatment options of *E. coli*  
55 bacteremia (ECB) are getting compromised by the pandemic presence of extended-spectrum  
56 beta-lactamases (ESBLs) [1–4]; enzymes that confer resistance to antibiotics commonly used  
57 for ECB treatment such as third-generation cephalosporins. ESBLs can be exchanged between  
58 strains by horizontal gene transfer, such as through carry-over of mobile genetic elements. In  
59 some European countries, the incidence of ECB with antibiotic-resistant strains seems to  
60 increase faster than ECB caused by susceptible strains [1–4]. The individual patient and  
61 financial burden is increased for ECB episodes that are caused by resistant *E. coli*. Yet, ECB  
62 due to susceptible strains is far more common and therefore determines the major part of the *E.*  
63 *coli* bacteremia disease burden in the population [1–4]. The majority of ECBs is of community  
64 onset and is preceded by an infection in the urinary tract, but other sources, such as the  
65 hepatic-biliary tract, also comprise important primary foci [4,7]. These clinical characteristics of  
66 ECB episodes are important because they can indicate different target populations for  
67 prevention. More insight in the molecular epidemiology of ESBL-negative as well as ESBL-  
68 positive ECB with different clinical characteristics is needed to help identify key targets for the  
69 development of future preventive strategies such as *E. coli* vaccines, which are currently being  
70 developed [8]. Up to now, the molecular epidemiology of ECB in the Netherlands has been  
71 mainly described in single-center studies [9] and among antimicrobial resistant isolates only  
72 [10,11]. Dutch studies combining patient characteristics with high-resolution genetic data of *E.*  
73 *coli* isolates are limited, specifically for ECB, with its potential severe clinical consequences.

74 In this study, we aimed to analyze the current population structure of ECB in the  
75 Netherlands, with special attention to differences in antimicrobial resistance and virulence gene  
76 content and serotype distribution between isolates with different clinical epidemiological  
77 characteristics and between non-ESBL-producing *E. coli* (non-ESBL-PEc) and ESBL-producing  
78 *E. coli* (ESBL-PEc) blood isolates.

## 79 **METHODS**

### 80 **Study design**

81 Details of the study design, epidemiological data collection and laboratory methods (i.e.  
82 phenotypic ESBL detection) are described elsewhere [12]. In short, patients with ECB were  
83 retrospectively identified from medical microbiological records in the University Medical Center  
84 Utrecht (UMCU), a 1,042-bed tertiary care center and the Amphia Hospital in Breda, an 837-bed  
85 teaching hospital. In each hospital, we selected a random sample of 40 isolates of unique  
86 patients per year for the years 2014, 2015 and 2016, comprising ~24% of all first bacteremic *E.*  
87 *coli* isolates in a year. In addition to this random sample, all ESBL-PEc blood isolates from 2014  
88 – 2016 were selected from the two hospitals. Whole genome sequencing (WGS) was performed  
89 by The Netherlands National Institute for Public Health and the Environment (RIVM) using the  
90 Illumina HiSeq 2500 (BaseClear, Leiden, the Netherlands). De novo assembly was performed  
91 using SPAdes genome assembler v.3.6.2 and the quality of assemblies was assessed using  
92 QUAST [13]. Only genomes with an estimated genome size between 3 MB and 6 MB and  
93 number of contigs not exceeding 1,000 were included in further analyses. Baseline clinical  
94 epidemiological characteristics were compared between the non-ESBL-PEc and ESBL-PEc  
95 ECB episodes. ESBL-production was defined as confirmed phenotypic ESBL-positivity, unless  
96 described otherwise [12]. Baseline characteristics were compared by the Fisher's Exact or  
97 Pearson  $\chi^2$  test for categorical variables and by Mann-Whitney U test for continuous variables  
98 when applicable. A two-tailed *P* value <0.05 was considered statistically significant.

99 This study does not fall under the scope of the Medical Research Involving Human  
100 Subjects Act. The Medical Research Ethics Committee of the UMCU has therefore waived the  
101 need for official approval by the Ethics Committee (IRB number 18/056) and informed consent  
102 was not obtained. All statistical analyses were performed with Statistical Package for Social  
103 Sciences V.25.0 (SPSS, Chicago, Illinois, USA) and R Version 3.4.1. Boxplots were made with  
104 R packages *ggplot2* and *ggpubr* and bar charts were made with Graphpad Prism Version 8.0.1.

### 105 **Multi-locus sequence types (MLST)**

106 Multi-locus sequence types (STs) were determined using mlst2.0  
107 (<https://github.com/tseemann/mlst>) by scanning contig files against the *E. coli* PubMLST typing  
108 scheme (updated May 12th, 2018). ST (i.e. clonal) distribution was presented stratified for non-  
109 ESBL-PEc and ESBL-PEc isolates and by epidemiological subgroup (i.e. community versus  
110 hospital onset; different primary foci of ECB). Genotype (ST) diversity was analysed by  
111 Simpson's diversity index [14]. A core-genome (cg) neighbour-joining (NJ) phylogenetic tree  
112 was constructed in Seqsphere with the *Escherichia/Shigella* cgMLST v1 scheme developed by  
113 Enterobase (<https://enterobase.warwick.ac.uk/species/index/ecoli>), containing 2,513 target  
114 genes and visualised using the free online available web-tool Microreact  
115 (<https://microreact.org/showcase>) [15]. The cgNJ method reconstructs phylogeny by using a  
116 distance matrix that contains the genetic distance between each pair of sequences.

### 117 **Serotyping**

118 We assigned serotypes by using the web-tool SerotypeFinder 2.0 from the Center for Genomic  
119 Epidemiology at the Danish Technical University, Lyngby, Denmark  
120 (<https://cge.cbs.dtu.dk/services/SerotypeFinder>) [16]. Simpson's index for serotype diversity  
121 was calculated for non-ESBL-PEc and ESBL-PEc isolates. Serotype distribution among non-  
122 ESBL-PEc and ESBL-PEc was compared to two current *E. coli* vaccine candidates [8,17],

123 excluding isolates in which no definitive serotype could be defined and the occurrence of  
124 serotypes was described by primary focus of ECB

### 125 **Antimicrobial resistance genes**

126 Abricate (<https://github.com/tseemann/abricate>) version 0.8.13 was used for mass screening of  
127 contigs for antimicrobial resistance genes using the ResFinder 3.1.0 database (acquired  
128 resistance genes), date of download 24 January 2019, and the Comprehensive Antibiotic  
129 Resistance Database (CARD) (all resistance genes), date of download 1 March 2019 [18,19].  
130 The thresholds for coverage length and sequence identity were 80% and 95%, respectively. A  
131 resistance gene count using each of the databases was made per isolate, which was defined as  
132 the total number of resistance genes (using CARD) and the total number of acquired resistance  
133 genes (using ResFinder) identified, respectively. In case of double detection of identical  
134 resistance genes within a single isolate, they were only counted once. The resistance gene  
135 scores were compared between non-ESBL-PEc and ESBL-PEc with the non-parametric  
136 Wilcoxon rank sum test (for this comparison only, the scores of the ESBL-PEc isolates were  
137 corrected for presence of the ESBL gene). Resistance gene scores were then analysed for non-  
138 ESBL-PEc and ESBL-PEc separately and were compared between isolates with different  
139 epidemiological characteristics and different STs using Kruskal-Wallis one-way ANOVA. In case  
140 of an overall ANOVA  $P$  value  $<0.05$ , post-hoc pairwise comparisons were made and the Holm-  
141 Bonferroni  $P$  value correction was applied to account for multiple testing. For pairwise  
142 comparisons, the non-parametric Wilcoxon rank sum test was used.

### 143 **Virulence genes**

144 The presence of putative virulence factor genes (VG) was identified using abricate version  
145 0.8.13 for BLAST against the VFDB database (<http://www.mgc.ac.cn/VFs>), date of download 8  
146 February 2019, with minimal coverage length and sequence identity 80% and 95% [20]. We  
147 searched for 49 putative VG that were previously described as extra-intestinal pathogenic *E. coli*

148 (ExPEC)-associated VG [21–25]. If any of the predefined VG were not included in VFDB,  
149 BLAST against the *ecoli\_VF\_collection* database was performed (date 8 February 2019), a  
150 repository that contains known VG from VFDB supplemented with additional *E. coli* VG that  
151 have been reported in literature [26]. The *kpsM*, *afa/dra* and *sfa/foc* operons were considered  
152 present if any of the corresponding genes or allelic variants were identified. A virulence score  
153 was made per isolate and was defined as the total number of pre specified VG, adjusted for  
154 multiple detection of the *afa/dra* (Afa/Dr adhesins), *pap* (P fimbrial adhesins), *sfa/foc* (S and F1C  
155 fimbrial adhesins) and *kpsM* (group 2 and III capsule) operons, as described previously [23]. If a  
156 VG was detected multiple times within a single isolate (i.e. with different quality measures), it  
157 was only counted once. These virulence scores were then compared between isolates with  
158 different epidemiological characteristics and between different STs using Kruskal-Wallis one-  
159 way ANOVA. In case of an overall ANOVA *P* value <0.05, post-hoc pairwise comparisons were  
160 made with the non-parametric Wilcoxon rank sum test and the Holm-Bonferroni *P* value  
161 correction was applied to account for multiple testing.

## 162 **RESULTS**

### 163 **Patient characteristics**

164 The isolate collection consisted of 212 phenotypic non-ESBL-PEc and 69 ESBL-PEc blood  
165 isolates (Fig. 1). Distribution of age, sex, onset of infection and primary foci were comparable  
166 between non-ESBL-PEc and ESBL-PEc bacteremia episodes (Table 1). As compared to non-  
167 ESBL-PEc, ECB episodes with ESBL-PEc were less often of community onset (63.8% versus  
168 81.1%, *P* value = 0.003). Crude 30-day and 1-year mortality was higher in ECB episodes  
169 caused by ESBL-PEc (27.5% and 50.7%, respectively) in comparison with ECB episodes  
170 caused by non-ESBL-PEc (11.3% and 29.2%, respectively).

171

172 **Clonal distribution**

173 Among non-ESBL-PEc, ST73 was the most frequently observed ST (12.3%), followed by ST131  
174 (10.4%). Isolates of ST73, 95, 127, 141, 80 and 1193 were solely identified among non-ESBL-  
175 PEc (Fig. 2). ST131 was dominant among ESBL-PEc (N = 30, 43.5%) and prevalence was  
176 higher than among non-ESBL-PEc ( $P$  value < 0.001). Simpson's index for ST diversity was  
177 95.6% (95% CI 94.4% – 96.8%) and 80.6% (95% CI 70.9% – 90.4%) for non-ESBL-PEc and  
178 ESBL-PEc, respectively. The occurrence of different STs did not differ between nosocomial and  
179 community onset ECB (S1 Figure and S2 Table). ST131 was the dominant ST among ESBL-  
180 positive ECB episodes with a primary urinary (63%) and hepatic-biliary focus (57%), which was  
181 higher as compared to other primary foci of ESBL-positive ECB (i.e. 21% among primary  
182 hepatic-biliary focus, see S3 Figure and S4 Table). The NJ-phylogenetic tree of all isolates can  
183 be found in the Supporting Information (S5 Figure).

184 **Figure 1.** Flowchart of selection of *E. coli* blood isolates

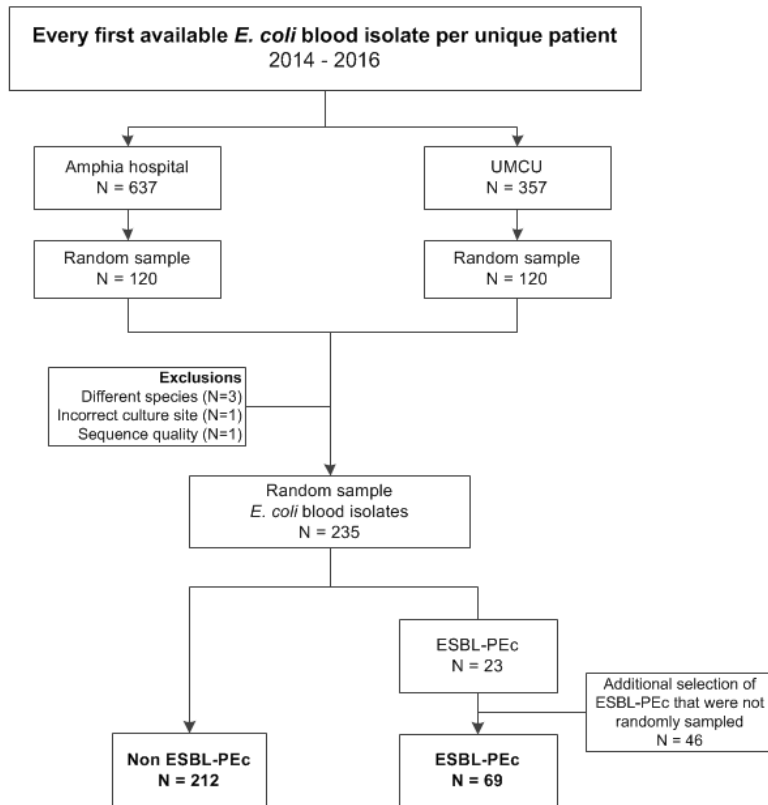



186 **Table 1.** Baseline epidemiological characteristics of *E. coli* bacteremia episodes

|                          | Non-ESBL-PEc <sup>a</sup><br>N = 212 |           | ESBL-PEc <sup>a</sup><br>N = 69 |           | P value <sup>b</sup> |
|--------------------------|--------------------------------------|-----------|---------------------------------|-----------|----------------------|
| Median age, years (IQR)  | 69                                   | (59 – 77) | 69                              | (56 – 76) | 0.802                |
| Female sex (%)           | 102                                  | (48.1)    | 32                              | (46.4)    | 0.802                |
| Community onset (%)      | 172                                  | (81.1)    | 44                              | (63.8)    | <i>0.003</i>         |
| Primary focus of ECB (%) |                                      |           |                                 |           |                      |
| Urinary tract            | 103                                  | (48.6)    | 30                              | (43.5)    | 0.785                |
| Hepatic-biliary          | 46                                   | (21.7)    | 14                              | (20.3)    |                      |
| Gastro-intestinal        | 23                                   | (10.8)    | 7                               | (10.1)    |                      |
| Other                    | 10                                   | (4.7)     | 5                               | (7.2)     |                      |
| Unknown                  | 30                                   | (14.2)    | 13                              | (18.8)    |                      |
| Urinary catheter (%)     | 69                                   | (32.5)    | 28                              | (40.6)    | 0.223                |
| Ward (%)                 |                                      |           |                                 |           |                      |
| Non-ICU                  | 182                                  | (85.8)    | 58                              | (84.1)    | 0.714                |
| ICU                      | 30                                   | (14.2)    | 11                              | (15.9)    |                      |
| Mortality (%)            |                                      |           |                                 |           |                      |
| 30-day                   | 24                                   | (11.3)    | 19                              | (27.5)    | <i>0.001</i>         |
| 1-year                   | 62                                   | (29.2)    | 35                              | (50.7)    | <i>0.001</i>         |

ECB, *E. coli* bacteremia; ESBL, extended-spectrum beta-lactamase; ESBL-PEc, ESBL-producing *E. coli*; ICU, intensive care unit; IQR, interquartile range; non-ESBL-PEc, non-ESBL-producing *E. coli*  
<sup>a</sup>ESBL-positivity based on phenotype.

<sup>b</sup>P value of comparison between non-ESBL-PEc versus ESBL-PEc, calculated with Pearson's  $\chi^2$ , Fisher's exact, or Mann-Whitney U test when applicable. P values in italic represent P values <0.05.

187 **Figure 2.** ST distribution among non-ESBL-PEc versus ESBL-PEc<sup>a</sup> in order of frequency<sup>b</sup>

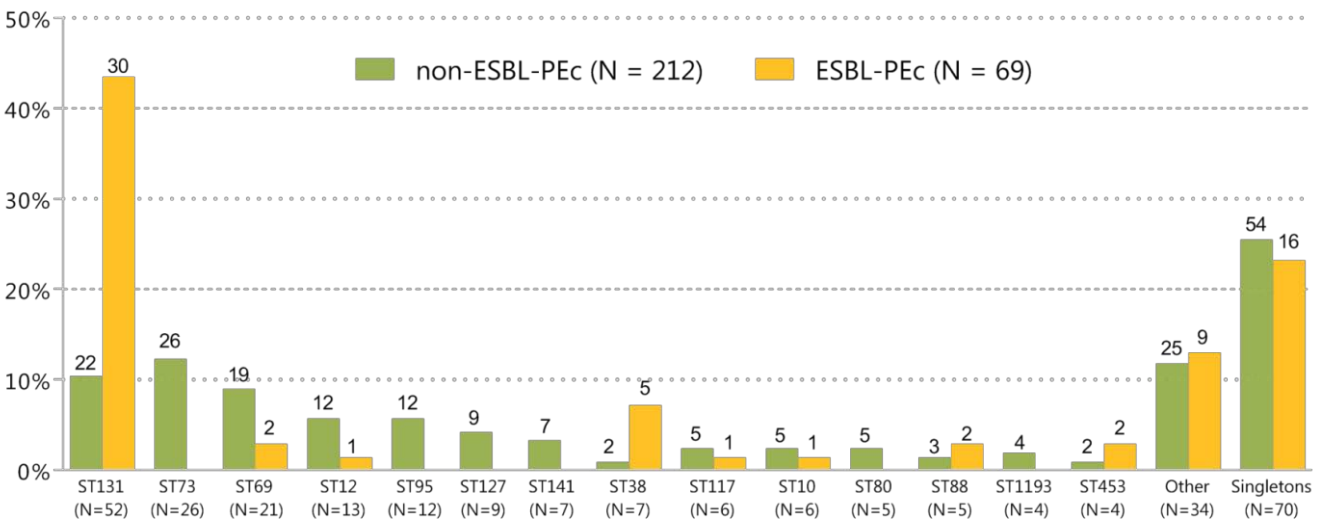

188 ESBL-PEc, ESBL-producing *E. coli*; non-ESBL-PEc, non-ESBL-producing *E. coli*; ST, sequence type

189 <sup>a</sup>ESBL-positivity based on phenotype.

190 <sup>b</sup>Missing STs and STs that occurred  $\leq 3$  times are grouped in "Other". STs that only occurred once are grouped in

191 "Singletons". The height of each individual bars represents the proportion of the ST within the group of non-ESBL-

192 PEc and ESBL-PEc, respectively. The numbers represent the absolute numbers of occurrence.

193

## 194 **Serotypes**

195 The most common serotype was O25:H4 and was identified in 19 (9.0%) non-ESBL-PEc and 24  
196 (34.8%) ESBL-PEc isolates, which largely reflected the prevalence of ST131 in each group  
197 (Table 2). Multiple serotypes only occurred among non-ESBL-PEc, such as O6:H1 and O6:H31.  
198 ST73 was most often of serotype O6:H1 (16 / 26, 61.5%). Simpson's index for serotype diversity  
199 was 96.7% (95% CI 95.8% – 97.6%) and 83.8% (95% CI 76.9% – 90.6%) for non-ESBL-PEc  
200 and ESBL-PEc, respectively. The distribution of O:serotypes per primary focus of ECB was  
201 mostly in line with the distribution of the most important STs per primary focus (i.e. ST131,  
202 ST73) (S6 Table).

203 53 (25.0%) non-ESBL-PEc and 25 (36.2%) ESBL-PEc isolates belonged to either O1,  
204 O2, O6 or O25, the serotypes of the 4-valent *E. coli* vaccine that has reached phase 2  
205 development stage [8,28], whereas the majority of non-ESBL-PEc (N = 113; 53.3%) and ESBL-  
206 PEc isolates (N = 35; 50.7%) belonged to one of the O:serotypes of the new 10-valent  
207 conjugant *E. coli* vaccine (ExPEC-10V) that is currently in development [17].

## 208 **Antimicrobial resistance genes**

209 In total, 110 unique resistance genes were identified with CARD and 69 unique acquired  
210 resistance genes were identified with ResFinder 3.1.0 (see S7 Table). ESBL-genes were  
211 detected in 65 (94.2%) of 69 *E. coli* blood isolates with phenotypic ESBL production. *bla*<sub>CTX-M-15</sub>  
212 was the most prevalent ESBL gene (N = 28, 43.1%), followed by *bla*<sub>CTX-M-9</sub> (N = 14, 21.5%) and  
213 *bla*<sub>CTX-M-27</sub> (N = 9, 13.8%). Assemblies of the phenotypic ESBL-PEc isolates in which no ESBL-  
214 gene was identified (N = 4) were individually uploaded on the DTU Resfinder 3.1.0 website  
215 (date 11 March 2019, thresholds for coverage length 80% and sequence identity 95%); these  
216 isolates remained genotypically ESBL-negative. One of these isolates was positive for *bla*<sub>CMY-2</sub>  
217 (AmpC gene).

218           The median total resistance gene count was 42 (IQR 39 – 45) for non-ESBL-PEc and 46  
219 (IQR 43 – 50) for ESBL-PEc isolates ( $P$  value < 0.001). The median acquired resistance gene  
220 count for non-ESBL-PEc versus ESBL-PEc was 1 (IQR 1 – 6) versus 7 (IQR 4 – 9) ( $P$  value <  
221 0.001). Among non-ESBL-PEc, total and acquired resistance gene counts were not different  
222 between community and hospital-onset ECB episodes (S8 Figure and S9 Table). Among non-  
223 ESBL-PEc, there were statistically significant differences in resistance gene count for different  
224 primary foci of ECB, but absolute differences were small (S8 Figure). The median acquired  
225 resistance gene count of non-ESBL-PEc isolates from ECB with a primary hepatic-biliary focus  
226 was 1 (IQR 1 – 1), whereas for a primary urinary focus this was 2 (IQR 1 – 6) ( $P$  value  $\leq$ 0.001),  
227 primary gastro-intestinal focus this was 4 (IQR 1 – 8) ( $P$  value  $\leq$ 0.01) and unknown primary  
228 focus this was 1 (IQR 1 – 6) ( $P$  value  $\leq$ 0.0001) (S9 Table). Among ESBL-PEc isolates, there  
229 were no statistical significant differences in total and acquired resistance gene counts between  
230 community and hospital-onset ECB or different primary foci of ECB (S8 Figure and S9 Table).  
231 Among non-ESBL-PEc, there was heterogeneity in total resistance gene count between almost  
232 all dominant STs; this was not the case for acquired resistance gene count (Fig. 3 and S10  
233 Table). No statistically significant differences were observed among ESBL-PEc isolates of  
234 different STs (S10 Table).

235 **Table 2.** Serotype distribution among *E. coli* blood isolates, stratified for ESBL-positivity

|                     | <b>Non-ESBL-PEc</b><br><b>N = 212 (%)</b> | <b>ESBL-PEc<sup>a</sup></b><br><b>N = 69 (%)</b> |
|---------------------|-------------------------------------------|--------------------------------------------------|
| O25:H4 (%)          | 19 (9.0)                                  | 24 (34.8)                                        |
| O6:H1 (%)           | 16 (7.5)                                  | -                                                |
| O2/O50:H6 (%)       | 10 (4.7)                                  | -                                                |
| O6:H31 (%)          | 9 (4.2)                                   | -                                                |
| O15:H18 (%)         | 7 (3.3)                                   | 2 (2.9)                                          |
| O17/O44/O77:H18 (%) | 8 (3.8)                                   | -                                                |
| O4:H5 (%)           | 7 (3.3)                                   | 1 (1.4)                                          |
| O75:H5 (%)          | 8 (3.8)                                   | -                                                |
| O8:H9               | 5 (2.4)                                   | 2 (2.9)                                          |
| O16:H5 (%)          | 3 (1.4)                                   | 3 (4.3)                                          |
| O86:H18             | 1 (0.5)                                   | 4 (5.8)                                          |
| O4:H1 (%)           | 5 (2.4)                                   | -                                                |
| O1:H7               | 4 (1.9)                                   | -                                                |
| O117:H4             | 4 (1.9)                                   | -                                                |
| O2/O50:H1           | 4 (1.9)                                   | -                                                |
| O23:H16             | 2 (0.9)                                   | 2 (2.9)                                          |
| O25:H1              | 4 (1.9)                                   | -                                                |
| O18/O18ac:H7        | 3 (1.4)                                   | -                                                |
| O2/O50:H7           | 3 (1.4)                                   | -                                                |
| O45:H7              | 3 (1.4)                                   | -                                                |
| O75:H7              | 3 (1.4)                                   | -                                                |
| O8:H17              | 3 (1.4)                                   | -                                                |
| O9:H17              | -                                         | 2 (2.9)                                          |
| O9/O104:H9          | -                                         | 2 (2.9)                                          |
| O13/O135:H4         | 2 (0.9)                                   | -                                                |
| O18:H1              | 2 (0.9)                                   | -                                                |
| O18:H5              | 2 (0.9)                                   | -                                                |
| O22:H1              | 2 (0.9)                                   | -                                                |
| O24:H4              | 2 (0.9)                                   | -                                                |
| O8:H10              | 2 (0.9)                                   | -                                                |
| O8:H25              | 2 (0.9)                                   | -                                                |
| O8:H30              | 2 (0.9)                                   | -                                                |
| Singletons          | 45 (21.2)                                 | 13 (18.8)                                        |
| Unknown             | 20 (9.4)                                  | 14 (20.3)                                        |

ESBL, extended-spectrum beta-lactamase; ESBL-PEc, ESBL-producing *E. coli*, non-ESBL-PEc, non-ESBL-producing *E. coli*

237 **Figure 3. Resistance gene count per ST, stratified for ESBL-positivity<sup>a</sup>**

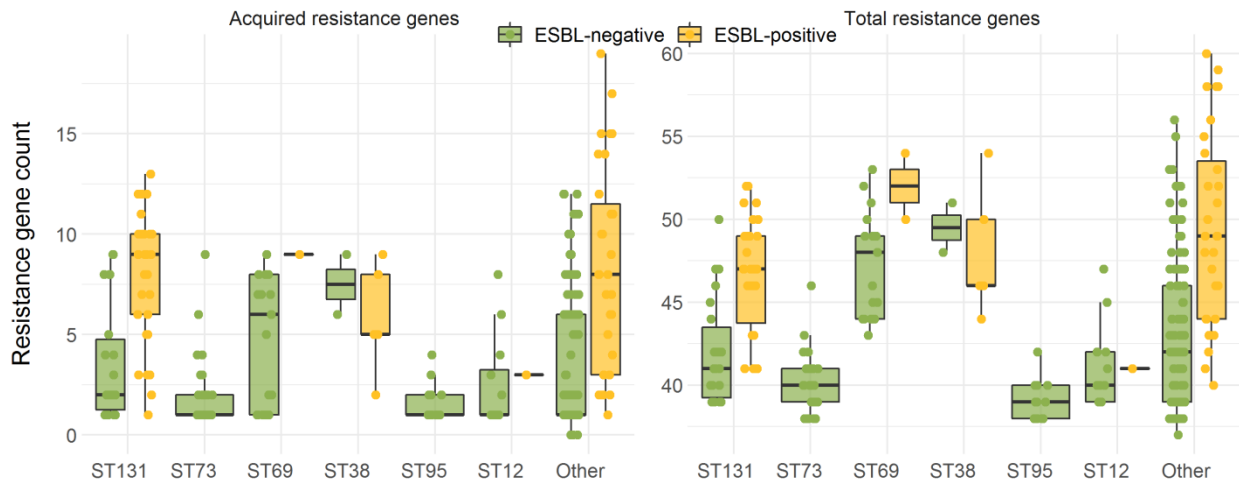

238

239 ESBL, extended-spectrum beta-lactamase; ST, sequence type

240 <sup>a</sup>ESBL-positivity based on phenotype.

241 Boxplots display median resistance gene count and inter quartile range (IQR); and every dot represents a single  
242 isolate. Results of the CARD database are depicted in the left graph and included all resistance genes. The results of  
243 the ResFinder 3.1.0 database are depicted in the right graph and only included acquired resistance genes. Only STs  
244 that occurred >5% within ESBLs or non-ESBLs were grouped into main groups, the rest was categorized as "Other".  
245 Results of the pairwise comparisons can be found in S10 Table.

246

## 247 Virulence genes

248 Of the 49 predefined ExPEC-associated VG, 44 (89.8%) were detected in at least one *E. coli*  
249 blood isolate (S11 Table). The median VG score was 13 (IQR 9 – 20) for non-ESBL-PEc and 12  
250 (IQR 8 – 14) for ESBL-PEc blood isolates ( $P$  value = 0.002). In one non-ESBL-PEc isolate no  
251 predefined ExPEC-associated VG was detected, while a maximum VG score of 25 was found in  
252 two non-ESBL-PEc isolates.

253 For non-ESBL-PEc and ESBL-PEc isolates, there was no significant difference in the VG  
254 score between isolates that caused community or hospital onset ECB (S13 Table). Non-ESBL-  
255 PEc isolates that caused ECB with a primary gastro-intestinal focus (median 10, IQR 6 – 13)  
256 and hepatic-biliary focus (median 11, IQR 5 – 18) had lower VG scores as compared to isolates  
257 with a primary focus in the urinary tract (median 15, IQR 11 – 21) ( $P$  value = 0.007 and  $P$  value  
258 = 0.036, respectively, see S12 Figure and S13 Table). Among non-ESBL-PEc and ESBL-PEc,  
259 there were no statistical significant differences in VG scores between isolates of patients without

260 versus with a urinary catheter, between patients alive or deceased after 30 days or between  
261 patients admitted to the intensive care unit (ICU) versus a non-ICU ward (data not shown).

262 There was heterogeneity in VG scores between non-ESBL-PEc of different STs, this  
263 was less pronounced for ESBL-PEc isolates (Fig. 4 and S14 Table). ESBL-negative ST38 had  
264 the lowest average VG score (median 7, IQR 6 – 7) and ESBL-positive ST12 had the highest  
265 VG score (median 23, IQR 23 – 23). Median VG score of both ESBL-negative and ESBL-  
266 positive ST131 isolates was 13 (IQR 12 – 15). All pairwise comparisons between ESBL-  
267 negative STs yielded Holm-Bonferroni adjusted  $P$  values  $< 0.05$ , except for the comparison  
268 ST12 versus ST73 and all pairwise comparisons that included ST38.

269 **Figure 4.** ExPEC-associated VG score in different STs, stratified for ESBL-positivity<sup>a</sup>

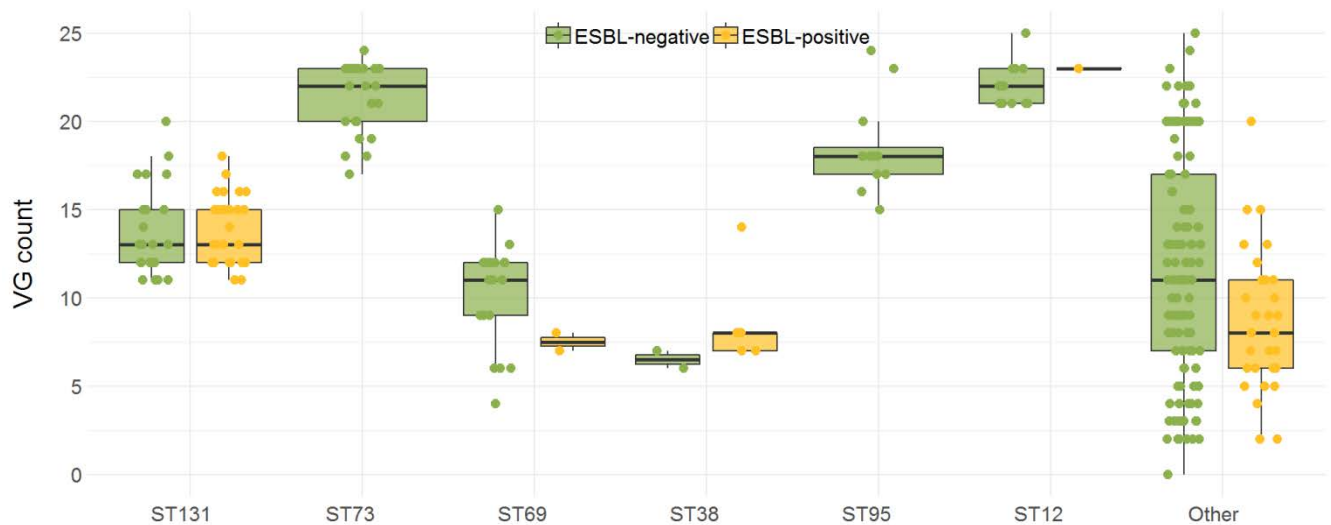

270  
271 ESBL, extended-spectrum beta-lactamase; ST, sequence type

272 <sup>a</sup>ESBL-positivity based on phenotype.

273 Boxplots display median VG score and inter quartile range (IQR); and every dot represents a single isolate. Only STs  
274 that occurred  $>5\%$  within ESBLs or non-ESBLs were grouped into main groups, the rest was categorized as "Other".  
275 Results of pairwise comparisons can be found in S14 Table.

276

## 277 DISCUSSION

278 In this study, we found that ESBL-producing *E. coli* blood isolates were different from non-  
279 ESBL-producing *E. coli* causing bacteraemia in terms of clonal distribution, serotype distribution,  
280 antimicrobial resistance gene count and VG scores.

281           The ST distribution among ESBL-PEc blood isolates was less diverse as compared to  
282 non-ESBL-PEc. This was mainly caused by the predominance of ST131 within ESBL-PEc, as  
283 has been described before [29,30]. In contrast, ST73, a ST that is known for its susceptible  
284 antibiotic profile [29], was only identified among non-ESBL-PEc blood isolates. The association  
285 between ESBL phenotype and STs in *E. coli*, which is repeatedly found, implies that the  
286 molecular backbone of strains can increase (or decrease) its propensity to acquire and  
287 subsequently maintain plasmids carrying ESBL genes. A recent large-scale study that  
288 compared the pan-genomes of invasive *E. coli* isolates, including ST131 and ST73, suggested  
289 that due to ongoing adaptation to long term human intestinal colonisation and consequent  
290 evolutionary gene selection, ST131 might have become able to reduce the fitness costs of long  
291 term plasmid maintenance [31,32]. Interestingly, in our study, isolates that belonged to ST73  
292 had low resistance gene content but relatively high VG score as compared to other STs.  
293 Furthermore, the average VG score among non-ESBL-PEc was slightly higher in comparison to  
294 ESBL-PEc blood isolates, which demonstrates that ESBL-positivity in *E. coli* is not necessarily  
295 related to an increased VG content. In case we would assume that VG content is associated  
296 with virulent potential, i.e. the ability of a strain to cause invasive disease, then these findings do  
297 not support the theory that increased virulence of resistant strains causes the increased  
298 incidence of resistant ECB as compared to sensitive ECB. This theory has been suggested for  
299 other pathogens, such as MRSA [1,33,34]. Still, results of the current study show that molecular  
300 characteristics of ESBL-PEc cannot be merely generalized to non-ESBL-PEc blood isolates,  
301 highlighting the importance of not preselecting on ESBL-positivity when investigating the  
302 molecular epidemiology of ECB.

303           One of our hypotheses was that the distributions of STs, resistance gene and VG  
304 content would differ between ECB episodes of community and hospital onset and between  
305 different primary foci, as a possible result of different levels of sub specialization of intestinal *E.*  
306 *coli* strains. However, we did not observe large differences when assessing epidemiological

307 subgroups, but found that these differences in molecular content mostly depended on  
308 phenotypic ESBL-production and STs. This confirms the findings from a recent study that was  
309 performed in Scotland [35]. In that study, there were combinations of virulence genes as well as  
310 a particular accessory gene composition that differentiated between STs rather than between  
311 epidemiological factors. The association between ST69 and community onset ECB, as found in  
312 the Scottish study, was not identified in the current study. Other differences were the large  
313 proportion of *E. coli* isolates from ECB episodes that were deemed hospital-acquired (62%) as  
314 compared to our study (18.4% for ESBL-negative and 36.2% for ESBL-positive ECB) and in that  
315 study, analyses were not stratified for ESBL-positivity. More studies that combine clinical  
316 characteristics with molecular characteristics of ECB are important, because these data help to  
317 further elucidate the role of host-specific factors versus strain-specific factors in the  
318 pathogenesis of ECB. Since different determinants of ECB might indicate different targets for  
319 surveillance or infection-prevention, a thorough understanding of the molecular epidemiology is  
320 needed to reduce the occurrence of this invasive infectious disease with potential severe clinical  
321 consequences.

322 We identified serotype O25:H4 as the most prevalent serotype causing ESBL-negative  
323 as well as ESBL-positive ECB in the Netherlands, followed by O6:H1. The serotype distribution  
324 among non-ESBL-PEc was more heterogeneous as compared to ESBL-PEc, similar to the  
325 differences in clonal diversity between these two groups. A large recent European surveillance  
326 study that included 1,110 *E. coli* blood isolates from adults between 2011 and 2017 showed that  
327 there is heterogeneity in serotype distribution among different countries, which highlights the  
328 need for country specific data [17]. Furthermore, we showed that the coverage of the new  
329 potential 10-valent vaccine was higher as compared to the 4-valent vaccine and was actually  
330 doubled for non-ESBL-PEc bacteremia. The findings of the current study can be used for future  
331 studies and can help further evaluation and implementation of *E. coli* vaccines.



332 Strengths of the current study are the multicenter design and combination of  
333 epidemiological characteristics and highly discriminatory genetic data. There are also important  
334 limitations. Firstly, *E. coli* is a heterogeneous species, of which the seven MLST genes only  
335 constitute a small proportion of the entire gene content. Because we also only investigated  
336 presence of a small fraction of the genes that are commonly part of the accessory genome,  
337 such as virulence and acquired resistance genes, but did not assess the entire accessory gene  
338 pool, we could have missed genomic differences between isolates that are reflected in the  
339 accessory gene pool only. Secondly, we selected *E. coli* isolates from a tertiary care center and  
340 teaching hospital from the Netherlands from two different regions, which we considered to be  
341 representative of the Netherlands. The description of strains that were identified here might not  
342 be entirely generalizable to other countries since there could be differences between circulating  
343 *E. coli* strains, dependent on local population characteristics and antimicrobial resistance levels.  
344 Thirdly, many pairwise comparisons between subgroups were performed, which increases the  
345 risk of false-positive findings (i.e. type I errors). Even though we applied a strict p-value  
346 correction for multiple testing, this naturally does not eliminate the risk of false-positive findings.  
347 The analyses on resistance gene and VG content should therefore be viewed as hypothesis  
348 generating.

349 In conclusion, there are molecular differences between non-ESBL-PEc and ESBL-PEc  
350 blood isolates that reach beyond their phenotypic ESBL positivity. Future genomic research of  
351 *E. coli* should preferably focus on *E. coli* without preselection on ESBL-positivity, to limit the risk  
352 of inferring characteristics of resistant *E. coli* to the *E. coli* population as a whole. Furthermore,  
353 more studies are needed to better understand repeatedly found associations between gene  
354 content and STs, which could aid the development of targeted preventive interventions.

355

356 **FUNDING**

357 This study was internally funded by the Netherlands National Institute for Public Health and the  
358 Environment (RIVM) and the University Medical Center Utrecht (UMCU) and the authors  
359 received no specific funding for this work.

360 **ACKNOWLEDGMENTS**

361 We would sincerely like to thank Kim van der Zwaluw, Carlo Verhulst and Judith Vlooswijk for  
362 their contributions in the laboratory execution of the study. We would also like to thank Janetta  
363 Top for her contributions to the core genome phylogenetic analyses. Preliminary results of this  
364 paper were presented at the 29th European Congress of Clinical Microbiology & Infectious  
365 Diseases, Amsterdam, the Netherlands (P1450).

366 **AUTHOR CONTRIBUTIONS**

| Author                    | Roles                                                                                                                                                                                                        |
|---------------------------|--------------------------------------------------------------------------------------------------------------------------------------------------------------------------------------------------------------|
| D. van Hout               | Conceptualization, data curation, formal analysis, investigation, methodology, project administration, software, validation, visualization, writing – original draft preparation, writing – review & editing |
| T.D. Verschuuren          | Conceptualization, data curation, formal analysis, investigation, methodology, project administration, software, validation, writing – review & editing                                                      |
| P.C.J. Bruijning-Verhagen | Conceptualization, formal analysis, methodology, supervision, validation, writing – review & editing                                                                                                         |
| T. Bosch                  | Conceptualization, data curation, formal analysis, methodology, investigation, methodology, funding acquisition, resources, software, supervision, writing – review & editing                                |
| A.C. Schürch              | Methodology, software, resources, supervision, validation, writing – review & editing                                                                                                                        |
| R.J.L. Willems            | Methodology, software, resources, supervision, writing – review & editing                                                                                                                                    |
| M.J.M. Bonten             | Conceptualization, formal analysis, funding acquisition, resources, supervision, writing – review & editing, writing – review & editing                                                                      |
| J.A.J.W. Kluytmans        | Conceptualization, formal analysis, resources, supervision, writing – review & editing                                                                                                                       |

367

368 **REFERENCES**

369 1. de Kraker MEA, Jarlier V, Monen JCM, Heuer OE, van de Sande N, Grundmann H. The changing

- 370 epidemiology of bacteraemias in Europe: trends from the European Antimicrobial Resistance  
371 Surveillance System. *Clin Microbiol Infect.* 2013;19: 860–868. doi:10.1111/1469-0691.12028
- 372 2. Van Der Steen M, Leenstra T, Kluytmans JAJW, Van Der Bij AK. Trends in expanded-spectrum  
373 cephalosporin-resistant *Escherichia coli* and *Klebsiella pneumoniae* among Dutch clinical isolates,  
374 from 2008 to 2012. *PLoS One.* 2015;10: e0138088. doi:10.1371/journal.pone.0138088
- 375 3. Schlackow I, Stoesser N, Walker AS, Crook DW, Peto TEA, Wyllie DH. Increasing incidence of  
376 *Escherichia coli* bacteraemia is driven by an increase in antibiotic-resistant isolates: electronic  
377 database study in Oxfordshire 1999–2011. *J Antimicrob Chemother.* 2012;67: 1514–1524.  
378 doi:10.1093/jac/dks082
- 379 4. Vihta K-D, Stoesser N, Llewelyn MJ, Quan TP, Davies T, Fawcett NJ, et al. Trends over time in  
380 *Escherichia coli* bloodstream infections, urinary tract infections, and antibiotic susceptibilities in  
381 Oxfordshire, UK, 1998–2016: a study of electronic health records. *Lancet Infect Dis.* 2018;18:  
382 1138–1149. doi:10.1016/S1473-3099(18)30353-0
- 383 5. Abernethy JK, Johnson AP, Guy R, Hinton N, Sheridan EA, Hope RJ. Thirty day all-cause  
384 mortality in patients with *Escherichia coli* bacteraemia in England. *Clin Microbiol Infect.* 2015;21:  
385 251.e1-8. doi:10.1016/j.cmi.2015.01.001
- 386 6. Fitzpatrick JM, Biswas JS, Edgeworth JD, Islam J, Jenkins N, Judge R, et al. Gram-negative  
387 bacteraemia; a multi-centre prospective evaluation of empiric antibiotic therapy and outcome in  
388 English acute hospitals. *Clin Microbiol Infect.* 2016;22: 244–251. doi:10.1016/j.cmi.2015.10.034
- 389 7. Abernethy J, Guy R, Sheridan EA, Hopkins S, Kiernan M, Wilcox MH, et al. Epidemiology of  
390 *Escherichia coli* bacteraemia in England: results of an enhanced sentinel surveillance programme.  
391 *J Hosp Infect.* 2017;95: 365–375. doi:10.1016/j.jhin.2016.12.008
- 392 8. Huttner A, Hatz C, van den Dobbelen G, Abbanat D, Hornacek A, Frolich R, et al. Safety,  
393 immunogenicity, and preliminary clinical efficacy of a vaccine against extraintestinal pathogenic  
394 *Escherichia coli* in women with a history of recurrent urinary tract infection: a randomised, single-  
395 blind, placebo-controlled phase 1b trial. *Lancet Infect Dis.* 2017;17: 528–537. doi:10.1016/S1473-  
396 3099(17)30108-1
- 397 9. Overdeest ITMA, Bergmans AMC, Verweij JJ, Vissers J, Bax N, Snelders E, et al. Prevalence of  
398 phylogroups and O25/ST131 in susceptible and extended-spectrum  $\beta$ -lactamase-producing  
399 *Escherichia coli* isolates, the Netherlands. *Clin Microbiol Infect.* 2015;21: 570.e1-e4.  
400 doi:10.1016/j.cmi.2015.02.020
- 401 10. Zhou X, Garcia-Cobos S, Ruijs GJHM, Kampinga GA, Arends JP, Borst DM, et al. Epidemiology of  
402 Extended-Spectrum beta-lactamase-Producing *E. coli* and Vancomycin-Resistant Enterococci in  
403 the Northern Dutch-German Cross-Border Region. *Front Microbiol.* 2017;8: 1914.  
404 doi:10.3389/fmicb.2017.01914
- 405 11. Voor In 't Holt AF, Wattel AA, Boers SA, Jansen R, Hays JP, Goessens WHF, et al. Detection of  
406 Healthcare-Related Extended-Spectrum Beta-Lactamase-Producing *Escherichia coli* Transmission  
407 Events Using Combined Genetic and Phenotypic Epidemiology. *PLoS One.* 2016;11: e0160156.  
408 doi:10.1371/journal.pone.0160156
- 409 12. van Hout D, Verschuuren TD., Bruijning-Verhagen PCJ., Bosch T., Reuland EA., Fluit AC., et al.  
410 Design of the EPIGENEC Study: Assessing the EPIdemiology and GENetics of *Escherichia coli* in  
411 the Netherlands. *Preprints.* 2019; 2019020066. doi:10.20944/preprints201902.0066.v1
- 412 13. Gurevich A, Saveliev V, Vyahhi N, Tesler G. QUAST: quality assessment tool for genome  
413 assemblies. *Bioinformatics.* 2013;29: 1072–1075. doi:10.1093/bioinformatics/btt086
- 414 14. Simpson EH. Measurement of diversity. *Nature.* 1949;163.

- 415 15. Argimon S, Abudahab K, Goater RJE, Fedosejev A, Bhai J, Glasner C, et al. Microreact:  
416 visualizing and sharing data for genomic epidemiology and phylogeography. *Microb genomics*.  
417 2016;2: e000093. doi:10.1099/mgen.0.000093
- 418 16. Joensen KG, Tetzschner AMM, Iguchi A, Aarestrup FM, Scheutz F. Rapid and Easy In Silico  
419 Serotyping of *Escherichia coli* Isolates by Use of Whole-Genome Sequencing Data. *J Clin*  
420 *Microbiol*. 2015;53: 2410–2426. doi:10.1128/JCM.00008-15
- 421 17. Geurtsen J, Weerdenburg E, Davies T, Go O, Spiessens B, Geet G Van, et al. Extraintestinal  
422 pathogenic *Escherichia coli* surveillance study to determine O-serotype prevalence and antibiotic  
423 resistance in blood isolates collected in Europe, 2011–2017. *ECCMID Conf #P1451*.
- 424 18. Jia B, Raphenya AR, Alcock B, Waglechner N, Guo P, Tsang KK, et al. CARD 2017: expansion  
425 and model-centric curation of the comprehensive antibiotic resistance database. *Nucleic Acids*  
426 *Res*. 2017;45: D566–D573. doi:10.1093/nar/gkw1004
- 427 19. Zankari E, Hasman H, Cosentino S, Vestergaard M, Rasmussen S, Lund O, et al. Identification of  
428 acquired antimicrobial resistance genes. *J Antimicrob Chemother*. 2012;67: 2640–2644.  
429 doi:10.1093/jac/dks261
- 430 20. Liu B, Zheng D, Jin Q, Chen L, Yang J. VFDB 2019: a comparative pathogenomic platform with an  
431 interactive web interface. *Nucleic Acids Res*. 2019;47: D687–D692. doi:10.1093/nar/gky1080
- 432 21. Johnson JR, Stell AL. Extended Virulence Genotypes of *Escherichia coli* Strains from Patients with  
433 Urosepsis in Relation to Phylogeny and Host Compromise. *J Infect Dis*. 2000;181: 261–72.  
434 doi:10.1086/315217
- 435 22. Johnson JR, Johnston BD, Porter S, Thuras P, Aziz M, Price LB. Accessory Traits and  
436 Phylogenetic Background Predict *Escherichia coli* Extraintestinal Virulence Better Than Does  
437 Ecological Source. *J Infect Dis*. 2019;219: 121–132. doi:10.1093/infdis/jiy459
- 438 23. Johnson JR, Porter S, Johnston B, Kuskowski MA, Spurbeck RR, Mobley HLT, et al. Host  
439 Characteristics and Bacterial Traits Predict Experimental Virulence for *Escherichia coli*  
440 Bloodstream Isolates From Patients With Urosepsis. *Open Forum Infect Dis*. 2015;2: ofv083.  
441 doi:10.1093/ofid/ofv083
- 442 24. Dale AP, Woodford N. Extra-intestinal pathogenic *Escherichia coli* (ExPEC): Disease, carriage and  
443 clones. *J Infect*. 2015;71: 615–626. doi:10.1016/j.jinf.2015.09.009
- 444 25. Dale AP, Pandey AK, Hesp RJ, Belogiannis K, Laver JR, Shone CC, et al. Genomes of  
445 *Escherichia coli* bacteraemia isolates originating from urinary tract foci contain more virulence-  
446 associated genes than those from non-urinary foci and neutropaenic hosts. *J Infect*. 2018;77: 534–  
447 543. doi:10.1016/j.jinf.2018.10.011
- 448 26. Leimbach A. *ecoli\_VF\_collection: V.0.1*. Zenodo. [Internet]. 2016. Available:  
449 <http://dx.doi.org/10.5281/zenodo.56686>.
- 450 27. Severiano A, Pinto FR, Ramirez M, Carrico JA. Adjusted Wallace coefficient as a measure of  
451 congruence between typing methods. *J Clin Microbiol*. 2011;49: 3997–4000.  
452 doi:10.1128/JCM.00624-11
- 453 28. Frenck RW, Ervin J, Chu L, Abbanat D, Spiessens B, Go O, et al. Safety and immunogenicity of a  
454 vaccine for extra-intestinal pathogenic *Escherichia coli* (ESTELLA): a phase 2 randomised  
455 controlled trial. *Lancet Infect Dis*. 2019;19: 631–640. doi:10.1016/S1473-3099(18)30803-X
- 456 29. Kallonen T, Brodrick HJ, Harris SR, Corander J, Brown NM, Martin V, et al. Systematic  
457 longitudinal survey of invasive *Escherichia coli* in England demonstrates a stable population  
458 structure only transiently disturbed by the emergence of ST131. *Genome Res*. 2017;27: 1437–

- 459 1449. doi:10.1101/gr.216606.116
- 460 30. Nicolas-Chanoine M-H, Bertrand X, Madec J-Y. *Escherichia coli* ST131, an intriguing clonal group.  
461 Clin Microbiol Rev. 2014;27: 543–574. doi:10.1128/CMR.00125-13
- 462 31. McNally A, Oren Y, Kelly D, Pascoe B, Dunn S, Sreecharan T, et al. Combined Analysis of  
463 Variation in Core, Accessory and Regulatory Genome Regions Provides a Super-Resolution View  
464 into the Evolution of Bacterial Populations. PLoS Genet. 2016;12: e1006280.  
465 doi:10.1371/journal.pgen.1006280
- 466 32. McNally A, Kallonen T, Connor C, Abudahab K, Aanensen DM, Horner C, et al. Diversification of  
467 Colonization Factors in a Multidrug-Resistant *Escherichia coli* Lineage Evolving under Negative  
468 Frequency-Dependent Selection. MBio. 2019;10: e00644-19. doi:10.1128/mBio.00644-19
- 469 33. Laupland KB, Lyytikäinen O, Sgaard M, Kennedy KJ, Knudsen JD, Ostergaard C, et al. The  
470 changing epidemiology of *Staphylococcus aureus* bloodstream infection: a multinational  
471 population-based surveillance study. Clin Microbiol Infect. 2013;19: 465–471. doi:10.1111/j.1469-  
472 0691.2012.03903.x
- 473 34. Mostofsky E, Lipsitch M, Regev-Yochay G. Is methicillin-resistant *Staphylococcus aureus*  
474 replacing methicillin-susceptible *S. aureus*? J Antimicrob Chemother. 2011;66: 2199–2214.  
475 doi:10.1093/jac/dkr278
- 476 35. Goswami C, Fox S, Holden M, Connor M, Leanord A, Evans TJ. Genetic analysis of invasive  
477 *Escherichia coli* in Scotland reveals determinants of healthcare-associated versus community-  
478 acquired infections. Microb genomics. 2018;4. doi:10.1099/mgen.0.000190
- 479
